# Supplementary material for: Improving the sectional Model for Simulating Aerosol Interactions and Chemistry (MOSAIC) aerosols of the Weather Research and Forecasting-Chemistry (WRF-Chem) model with the revised Gridpoint Statistical Interpolation system and multi-wavelength aerosol optical measurements: the dust aerosol observation campaign at Kashi, near the Taklimakan Desert, northwestern China
Source: Copernicus journal article supplement (doi:10.5194/acp-21-4403-2021), 2021-03-22
Supplement: Supplementary file 1 [file acp-21-4403-2021-supplement.pdf]

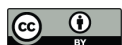

*Supplement of*

**Improving the sectional Model for Simulating Aerosol Interactions and Chemistry (MOSAIC) aerosols of the Weather Research and Forecasting-Chemistry (WRF-Chem) model with the revised Gridpoint Statistical Interpolation system and multi-wavelength aerosol optical measurements: the dust aerosol observation campaign at Kashi, near the Taklimakan Desert, northwestern China**

**Wenyuan Chang et al.**

*Correspondence to:* Wenyuan Chang (changwy@mail.iap.ac.cn) and Zhengqiang Li (lizq@radi.ac.cn)

The copyright of individual parts of the supplement might differ from the article licence.

Table S1. Real and imaginary parts of complex refractive indexes of aerosol chemical compositions and water

| (nm)                                                     | 440   | 450   | 470   | 520    | 525    | 550   | 635    | 660    | 675    | 870   | 1020  |
|----------------------------------------------------------|-------|-------|-------|--------|--------|-------|--------|--------|--------|-------|-------|
| <i>Sulfate, Nitrate, Ammonium (Toon et al., 1976)</i>    |       |       |       |        |        |       |        |        |        |       |       |
| Real                                                     | 1.54  | 1.54  | 1.54  | 1.535  | 1.53   | 1.53  | 1.53   | 1.525  | 1.525  | 1.52  | 1.52  |
| Imag                                                     |       |       |       |        |        | 0     |        |        |        |       |       |
| <i>OC (Chen and Bond, 2010)</i>                          |       |       |       |        |        |       |        |        |        |       |       |
| Real                                                     |       |       |       |        |        | 1.55  |        |        |        |       |       |
| Imag                                                     |       |       |       |        |        | 0.001 |        |        |        |       |       |
| <i>BC (Bond and Berstrom, 2006)</i>                      |       |       |       |        |        |       |        |        |        |       |       |
| Real                                                     |       |       |       |        |        | 1.95  |        |        |        |       |       |
| Imag                                                     |       |       |       |        |        | 0.79  |        |        |        |       |       |
| <i>Chlorine, Sodium (Toon et al., 1976)</i>              |       |       |       |        |        |       |        |        |        |       |       |
| Real                                                     | 1.56  | 1.56  | 1.56  | 1.55   | 1.55   | 1.55  | 1.55   | 1.54   | 1.54   | 1.53  | 1.53  |
| Imag                                                     |       |       |       |        |        | 0     |        |        |        |       |       |
| <i>OIN, dust (Cheng et al., 2006; Zhao et al., 2010)</i> |       |       |       |        |        |       |        |        |        |       |       |
| Real                                                     |       |       |       |        |        | 1.53  |        |        |        |       |       |
| Imag                                                     | 0.003 | 0.003 | 0.003 | 0.0025 | 0.0025 | 0.002 | 0.0015 | 0.0015 | 0.0015 | 0.001 | 0.001 |
| <i>H<sub>2</sub>O</i>                                    |       |       |       |        |        |       |        |        |        |       |       |
| Real                                                     | 1.337 | 1.337 | 1.337 | 1.337  | 1.335  | 1.335 | 1.335  | 1.335  | 1.332  | 1.33  | 1.328 |
| Imag                                                     |       |       |       |        |        | 0     |        |        |        |       |       |

† The refractive indexes that are constant across the wavelengths are only written at 550 nm for clarity.

Table S2. Aerosol density (unit: g cm<sup>-3</sup>; Barnard et al., 2010)

| SO4 | NO3 | NH4 | CL  | NA  | OC  | BC  | OIN | H2O |
|-----|-----|-----|-----|-----|-----|-----|-----|-----|
| 1.8 | 1.8 | 1.8 | 2.2 | 2.2 | 1.4 | 1.8 | 2.6 | 1.0 |

## References

- Barnard, J. C., Fast, J. D., Paredes-Miranda, G., Arnott, W. P., and Laskin, A.: Technical Note: Evaluation of the WRF-Chem “Aerosol Chemical to Aerosol Optical Properties” Module using data from the MILAGRO campaign, *Atmos. Chem. Phys.*, 19, 7325-7340, doi:10.5194/acp-10-7325-2010, 2010.
- Bond, T. C., and Bergstrom, R. W.: Light absorption by carbonaceous particles: an investigative review, *Aerosol Sci. Tech.*, 40, 27-67, doi:10.1080/02786820500421521, 2006.
- Chen, Y., and Bond, T. C.: Light absorption by organic carbon from wood combustion, *Atmos. Chem. Phys.*, 10, 1773-1787, doi:10.5194/acp-10-1773-2010, 2010.
- Cheng, T., Wang, H., Xu, Y., Li, H., and Tian, L.: Climatology of aerosol optical properties in northern China, *Atmos. Environ.*, 40, 1495-1509, doi:10.1016/j.atmosenv.2005.10.047, 2006.
- Toon, O. B., Pollack, J. B., and Khare, B. N.: The optical constants of several atmospheric aerosol species: ammonium sulfate, aluminum oxide, and sodium chloride, *J. Geophys. Res.*, 81, 33, doi:10.1029/JC081i033p05733, 1976.
- Zhao, C., Liu, X., Leung, L. R., Johnson, B., McFarlane, S. A., Gustafson Jr., W. I., Fast, J. D., and Easter, R.: The spatial distribution of mineral dust and its shortwave radiative forcing over North Africa: modeling sensitivities to dust emissions and aerosol size treatments, *Atmos. Chem. Phys.*, 10, 8821-8838, doi:10.5194/acp-10-8821-2010, 2010.

Table S3. Mean biases, correlation coefficients ( $R$ ) of  $PM_{2.5}$  and  $PM_{10}$  and the  $PM_{2.5}/PM_{10}$  ratios in DA\_PMx in the model background and the analyses at Kashi in April 2019 as scaling the background error of the fourth size-bin OIN (oin\_a04).

|             | $PM_{2.5}$ ( $\mu\text{g m}^{-3}$ ) |      | $PM_{10}$ ( $\mu\text{g m}^{-3}$ ) |      | $PM_{2.5}/PM_{10}$ |
|-------------|-------------------------------------|------|------------------------------------|------|--------------------|
|             | Mean Bias                           | $R$  | Mean Bias                          | $R$  |                    |
| Observation | 91.0                                |      | 323.2                              |      | 0.28               |
| Background  | -15.7                               | 0.28 | -132.5                             | 0.24 | 0.39               |
| DA Analysis |                                     |      |                                    |      |                    |
| 1.0×oin_a04 | -1.7                                | 0.89 | 6.1                                | 0.99 | 0.27               |
| 0.9×oin_a04 | 2.46                                | 0.91 | 6.76                               | 0.99 | 0.28               |
| 0.8×oin_a04 | 3.29                                | 0.94 | 4.09                               | 0.98 | 0.29               |
| 0.7×oin_a04 | 5.17                                | 0.95 | -1.92                              | 0.99 | 0.30               |
| 0.6×oin_a04 | 5.94                                | 0.97 | -4.29                              | 0.98 | 0.31               |
| 0.5×oin_a04 | 6.63                                | 0.97 | -12.39                             | 0.98 | 0.32               |
| 0.4×oin_a04 | 6.62                                | 0.98 | -18.47                             | 0.98 | 0.33               |
| 0.3×oin_a04 | 5.92                                | 0.98 | -26.4                              | 0.97 | 0.33               |

Table S4a. PM<sub>2.5</sub>, PM<sub>10</sub>, and the aerosol number concentrations in the second (num\_a02) and the fourth (num\_a04) size bin at Kashi on 1200UTC April 9, 2019, when individually assimilating aerosol absorption coefficient (DA\_Eabs) with the different imaginary parts of the dust complex refractive index at 470, 520, and 660 nm.

|                                         | PM <sub>2.5</sub><br>(µg/m <sup>3</sup> ) | PM <sub>10</sub><br>(µg/m <sup>3</sup> ) | num_a02<br>(#/kg) | num_a04<br>(#/kg) |
|-----------------------------------------|-------------------------------------------|------------------------------------------|-------------------|-------------------|
| Observation                             | 157                                       | 617                                      |                   |                   |
| Imaginary part of dust refractive index |                                           |                                          |                   |                   |
| 470nm                                   | 520nm                                     | 660nm                                    |                   |                   |
| 0                                       | 0                                         | 0                                        | 698               | 1987              |
| 0.001                                   | 0.001                                     | 0.001                                    | 559               | 1771              |
| 0.008                                   | 0.008                                     | 0.008                                    | 306               | 860               |
| 0.01                                    | 0.01                                      | 0.01                                     | 275               | 742               |
| 0.02                                    | 0.02                                      | 0.02                                     | 230               | 532               |
|                                         |                                           |                                          | 71222226176       | 7298349           |
|                                         |                                           |                                          | 5019896320        | 6861575           |
|                                         |                                           |                                          | 2681975552        | 3133878           |
|                                         |                                           |                                          | 2398040064        | 2647442           |
|                                         |                                           |                                          | 2182263040        | 1710307           |

Table S4b. The same to Table S4a but for Eabs, Eabs/PM<sub>10</sub>, Esca, and SSAsrf<sup>†</sup>.

|                                         | 660 nm Eabs<br>(M m <sup>-1</sup> ) | 660nm<br>Eabs/PM <sub>10</sub><br>(M m <sup>-1</sup> µg m <sup>-3</sup> ) | 520 nm Eabs<br>(M m <sup>-1</sup> ) | 525 nm Esca<br>(M m <sup>-1</sup> ) | SSAsrf |
|-----------------------------------------|-------------------------------------|---------------------------------------------------------------------------|-------------------------------------|-------------------------------------|--------|
| Observation                             | 64.4                                | 0.104                                                                     | 90.8                                | 436.8                               | 0.83   |
| Imaginary part of dust refractive index |                                     |                                                                           |                                     |                                     |        |
| 470nm                                   | 520nm                               | 660nm                                                                     |                                     |                                     |        |
| 0                                       | 0                                   | 0                                                                         | 92.5                                | 0.047                               | 144.6  |
| 0.001                                   | 0.001                               | 0.001                                                                     | 74.5                                | 0.042                               | 118.1  |
| 0.008                                   | 0.008                               | 0.008                                                                     | 32.5                                | 0.038                               | 52.7   |
| 0.01                                    | 0.01                                | 0.01                                                                      | 28.7                                | 0.039                               | 45.4   |
| 0.02                                    | 0.02                                | 0.02                                                                      | 23.8                                | 0.045                               | 37.6   |
|                                         |                                     |                                                                           |                                     |                                     | 1475.0 |
|                                         |                                     |                                                                           |                                     |                                     | 1163.8 |
|                                         |                                     |                                                                           |                                     |                                     | 603.1  |
|                                         |                                     |                                                                           |                                     |                                     | 532.3  |
|                                         |                                     |                                                                           |                                     |                                     | 436.3  |

<sup>†</sup> SSAsrf=Esca525/(Esca525+Eabs520)

Table S5. Analyses of DA\_Eabs with different scaling factors for the background errors (bc\_a0x) of black carbon at Kashi in April 2019. The underlined number in bold denotes the monthly mean value that is not significantly different from the observation, and the dashed line denotes an insignificant correlation. Both the statistical tests of the mean difference and correlation are conducted at the significance level of 0.05.

| DA experiment      | PM <sub>2.5</sub><br>( $\mu\text{g m}^{-3}$ ) | PM <sub>10</sub><br>( $\mu\text{g m}^{-3}$ ) | 870 nm<br>AOD      | 635nm Esca<br>( $\text{Mm}^{-1}$ ) | 660nm Eabs<br>( $\text{Mm}^{-1}$ ) | SSAsrf |
|--------------------|-----------------------------------------------|----------------------------------------------|--------------------|------------------------------------|------------------------------------|--------|
| Observation        | 91.0                                          | 323.2                                        | 0.66               | 231.5                              | 47.4                               | 0.78   |
| Background         | <u>72.2</u> (0.29)                            | 190.7 (0.24)                                 | 0.24 (0.60)        | 123.3 (0.36)                       | 12.9 (0.34)                        | 0.86   |
| 1×bc_a0x (DA_Eabs) | 298.8 (0.36)                                  | 1281 (0.34)                                  | 1.73 (----)        | 612.2 (0.54)                       | <u>40.0</u> (0.98)                 | 0.90   |
| 2×bc_a0x           | 244.3 (0.42)                                  | 1020 (0.36)                                  | 1.46 (0.33)        | 509.8 (0.55)                       | <u>44.3</u> (1.00)                 | 0.88   |
| 3×bc_a0x           | 209.0 (0.45)                                  | 844.1 (0.40)                                 | 1.20 (0.36)        | 425.7 (0.58)                       | <u>46.4</u> (0.98)                 | 0.86   |
| 4×bc_a0x           | 180.3 (0.50)                                  | 714.7 (0.46)                                 | 1.00 (0.40)        | 362.0 (0.57)                       | <u>48.3</u> (0.95)                 | 0.84   |
| 5×bc_a0x           | 155.3 (0.48)                                  | 599.4 (0.41)                                 | <u>0.82</u> (0.40) | 306.3 (0.51)                       | <u>49.8</u> (0.93)                 | 0.81   |
| 6×bc_a0x           | 138.2 (0.43)                                  | 526.8 (0.43)                                 | 0.71 (0.39)        | <u>271.2</u> (0.49)                | <u>51.8</u> (0.93)                 | 0.79   |
| 7×bc_a0x           | <u>122.4</u> (0.45)                           | <u>463.7</u> (0.42)                          | <u>0.61</u> (0.43) | <u>239.4</u> (0.49)                | <u>53.7</u> (0.92)                 | 0.78   |
| 8×bc_a0x           | <u>110.6</u> (0.42)                           | <u>402.1</u> (0.38)                          | <u>0.53</u> (0.39) | <u>213.9</u> (0.50)                | <u>55.2</u> (0.90)                 | 0.75   |
| 9×bc_a0x           | <u>100.6</u> (0.37)                           | <u>358.7</u> (0.41)                          | 0.46 (0.36)        | <u>194.4</u> (0.47)                | <u>56.2</u> (0.88)                 | 0.73   |

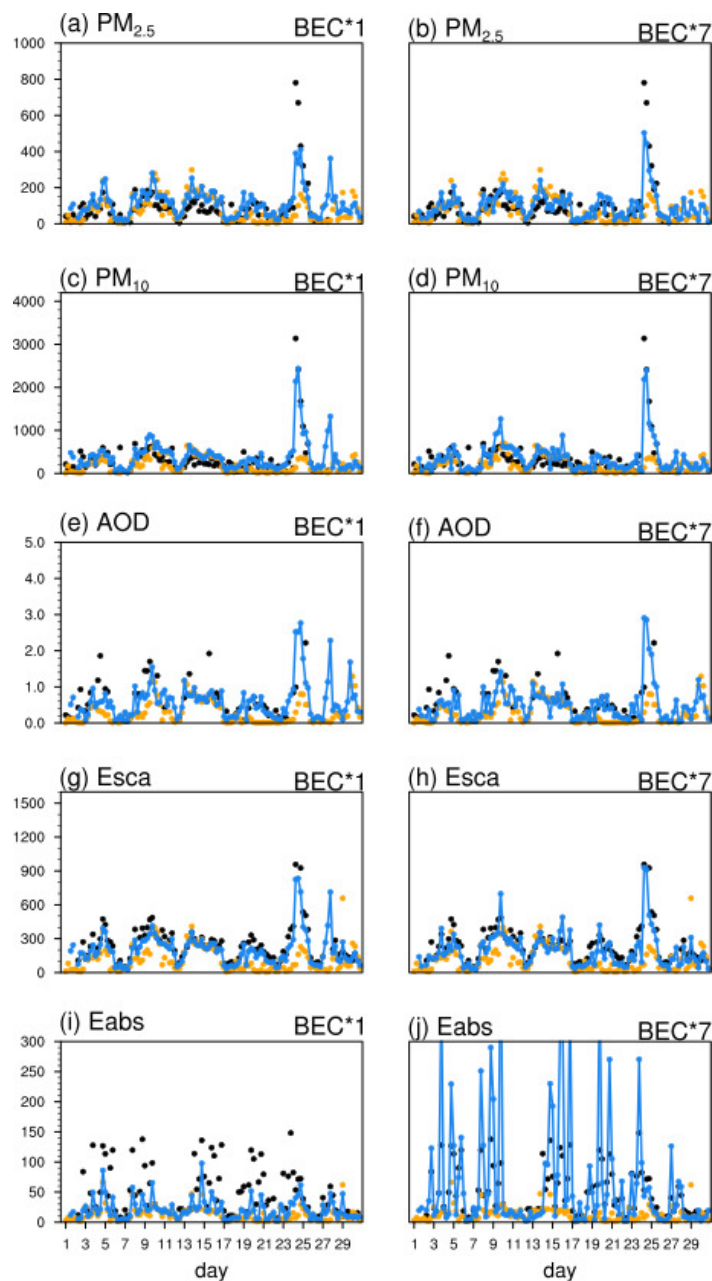

Figure S1. Comparison of (a-b)  $PM_{2.5}$  ( $\mu\text{g m}^{-3}$ ), (c-d)  $PM_{10}$  ( $\mu\text{g m}^{-3}$ ), (e-f) 870 nm AOD, (g-h) 635 nm aerosol scattering coefficient (Esca,  $\text{Mm}^{-1}$ ), and (i-j) 660 nm aerosol absorption coefficient (Eabs,  $\text{Mm}^{-1}$ ) in the observation (black solid point), the background simulation (orange solid point), and the DA analyses (blue line) when assimilating the aerosol scattering and absorption coefficients with the original background error of BC (BEC\*1, left column, DA\_Esca\_Eabs) and the BEC enlarged by a factor of 7 (BEC\*7, right column, DA\_Esca\_Eabs\_BC\*7) at Kashi in April 2019.
